# Supplementary material for: Self-assembly and alterable relaxivity of an organic cation-encapsulated gadolinium-containing polyoxometalate
Source: Royal Society of Chemistry journal article supplement (doi:10.1039/c2dt30641g), 2012-01-01
Supplement: c2dt30641g.pdf [file c2dt30641g.pdf]

# Electronic Supplementary Information

## **Self-Assembly and Alterable Relxivity of an Organic Cation- Encapsulated Gadolinium-Containing Polyoxometalate**

*Yinglin Wang, Shengyan Zhou, Daliang Kong, Haishan Yang, Ulrich Kortz,  
Wenqiang Chai and Lixin Wu\**

[\*]Dr. Y. Wang and Prof. L. Wu

State Key Laboratory of Suprmolecular Structure and Materials, Jilin University  
Changchun, 130012 (P. R. China)

S. Zhou, D. Kong and Prof. H. Yang

Radiology Department, China-Japan Union Hospital of Jilin University  
Changchun, 130012 (P. R. China)

W. Chai

Institut für Physikalische Chemie, Johannes Gutenberg-Universität Mainz,  
Jakob-Welder-Weg 11, D-55128 Mainz, Germany

Prof. U. Kortz

School of Engineering and Science, Jacobs University Bremen,  
P.O. Box 750 561, 28725, Bremen, Germany

\* To whom correspondence should be addressed.

E-mail: [wulx@jlu.edu.cn](mailto:wulx@jlu.edu.cn)

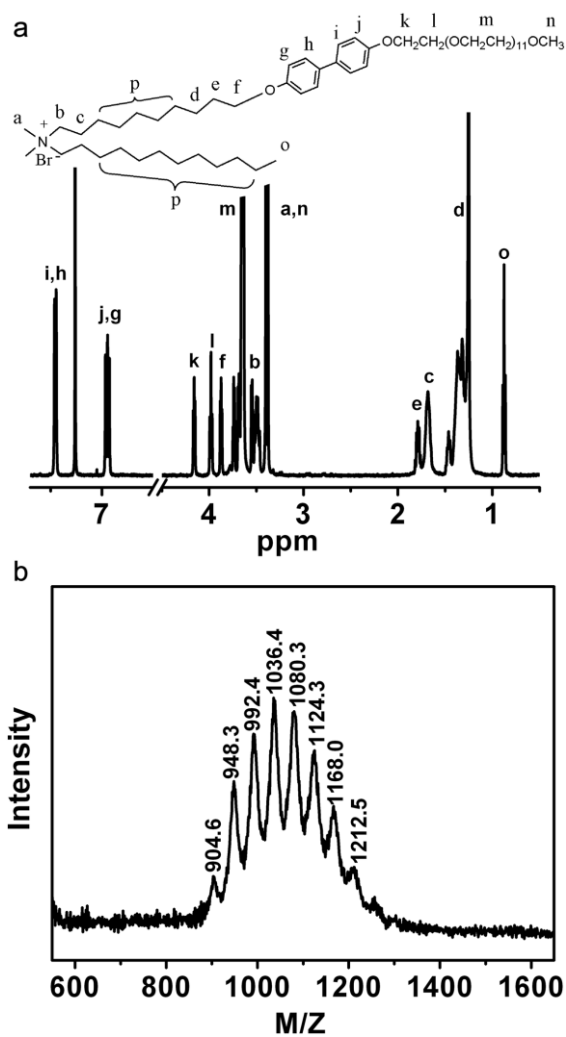

**Figure S1.** (a)  $^1\text{H}$  NMR and (b) MALDI-TOF mass spectra of  $\text{EO}_{12}\text{BphC}_{10}\text{NC}_{12}$ . The increments of  $m/z$  values of adjacent peaks in MS spectrum are about 44, corresponding to the molecular weight of the repeat unit of PEO chain.

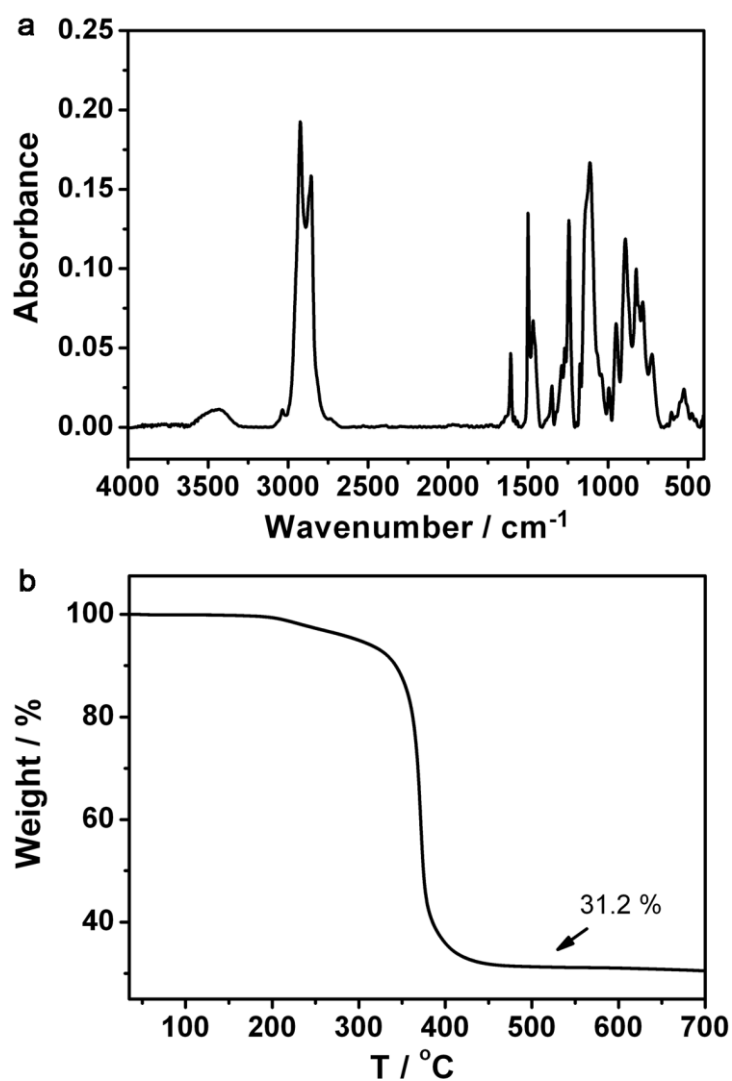

**Figure S2.** (a) The FT-IR and TGA results of OCEP-Gd.

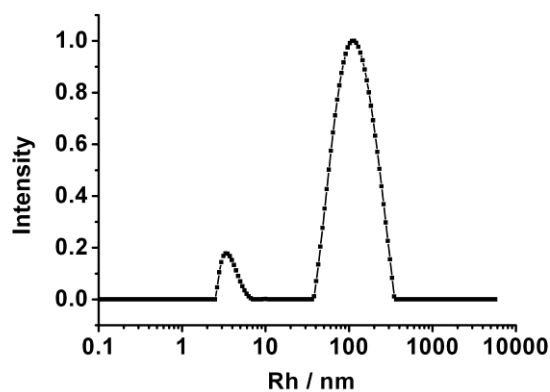

**Figure S3.** DLS curve of  $1 \text{ mg ml}^{-1}$  OCEP-Gd aqueous solution.

### The calculation of OCEP-Gd lay distance:

The Length of EO<sub>12</sub>BphC<sub>10</sub>NC<sub>12</sub> except PEO parts is measured to be 2.1 nm.

We assumed the density of PEO is the same with the bulk sample, 1.061 g cm<sup>-3</sup>, and the volume of amorphous PEO layer can be evaluated as:

$$V_{PEO} = \frac{M_{PEO}}{\rho_{PEO}} \quad (1)$$

where  $M_{PEO}$  is molecular weight of PEO, 518.4 cm<sup>3</sup> mol<sup>-1</sup>.

Because the volume of different layer is based on the height of layer, the ratio of  $H_{PEO}/H_{POM}$  is equal to the ratio of  $V_{PEO}/V_{POM}$ , which is expressed in equation (2)

$$\frac{H_{PEO}}{H_{POM}} = \frac{V_{PEO}}{V_{POM}} \quad (2)$$

The height of POM layer is equal to the diameter of lacunary Keggin-type POMs, 1.04 nm. So the height of PEO layers is

$$H_{PEO} = \frac{H_{POM} V_{PEO}}{V_{POM}} = \frac{1.04 \text{ nm} \times 518.4 \text{ cm}^3 / \text{mol}}{6.02 \times 10^{23} \times \left(\frac{4}{3} \times \pi \times 0.5 \text{ nm} \times 0.5 \text{ nm} \times 1 \text{ nm}\right)} = 0.86 \text{ nm} \quad (3)$$

Then, we can calculate the layer distance of phase-separated OCEP-Gd from Equation (4):

$$D_{\text{OCEP-Gd}} = H_{POM} + 2(H_{PEO} + H_{\text{BphC}_{10}\text{NC}_{12}}) = 1.04 + 2(0.55 + 2.1) = 6.9 \text{ nm} \quad (4)$$
